# Supplementary material for: Five new cases of syndromic intellectual disability due to KAT6A mutations: widening the molecular and clinical spectrum
Source: Springer Nature journal article supplement (doi:10.1186/s13023-020-1317-9), 2020-02-10
Supplement: MOESM1 [file 17666918]

**Supplementary Table 1.** Variants of Unknown significance identified in Patient 1.

| Gene          | cDNA       | Protein      | Zig | Disease <sup>1</sup> (MIM; Inh)                      | Origin       | gnomAD MAF (Hom) | dbSNP       | Effect (CADD/SIFT/PP2) | Clin Var                               | Class <sup>2</sup> (ACMG) |
|---------------|------------|--------------|-----|------------------------------------------------------|--------------|------------------|-------------|------------------------|----------------------------------------|---------------------------|
| <b>ENPP1</b>  | c.350T>C   | p.Phe117Ser  | het | Cole disease (615522; AD)                            | De novo      | -                | -           | 24.8/T/D               | -                                      | Likely benign             |
| <b>APOB</b>   | c.3337G>C  | p.Asp1113His | hom | Hypobetalipoproteinemia (615558; AR)                 | Both parents | 0.0069 (23)      | rs12713844  | 24.1/D/D               | Conflicting: B (7); LB(4); P(1); US(1) | Benign                    |
| <b>RNF213</b> | c.12817G>A | p.Asp4273Asn | het | <i>Susceptibility to Moyamoya disease 2 (607151)</i> | Pat          | 0.0027 (2)       | rs141329059 | 29.5/T/D               | -                                      | Likely benign             |
|               | c.14030G>T | p.Trp4677Leu | het |                                                      | Mat          | 0.0104 (29)      | rs61741961  | 28/D/D                 | -                                      | Likely benign             |

Zig: homozygosity/heterozygosity; het: heterozygote; hom: homozygotes (number of homozygotes in GnomAD database); Inh: inheritance; Pat: paternal; Mat: maternal; SIFT (D - Damaging; T - Tolerated); PP2: Polyphen2 (D - Probably damaging; P - Possibly damaging; B - Benign).

1. Pathologies previously associated with mutations in these genes. In brackets MIM number of the associated disease and its inheritance (according to OMIM).

2. According with the ACMG/AMP 2015 guideline

**Supplementary Table 2.** Variants of Unknown significance identified in Patient 2.

| Gene   | c.DNA     | Protein      | Zig | Disease1 (MIM; Inh)                              | gnomAD<br>MAF | dbSNP       | Effect<br>(CADD/SIFT/PP2) | Class <sup>2</sup><br>(ACMG) |
|--------|-----------|--------------|-----|--------------------------------------------------|---------------|-------------|---------------------------|------------------------------|
| MYOC   | c.767C>T  | p.Thr256Met  | het | Glaucoma 1A, primary<br>open angle (137750, AD)  | 0.000083      | rs200072086 | 19,07/D/PD                | LB                           |
| ITGA8  | c.2445G>T | p.Glu815Asp  | het | Renal<br>hypodysplasia/aplasia 1<br>(191830, AR) | 0.00048       | rs112914197 | 10,95/T/B                 | LB                           |
| C2CD3  | c.6833A>G | p.Asn2278Ser | het | Orofaciodigital syndrome<br>XIV (615948, AR)     | 0.00038       | rs199993353 | 23,2/D/B                  | US                           |
| UROC1  | c.883C>T  | p.Arg295Cys  | het | Uncertain. Urocanase<br>deficiency (276880, AR)  | 0.000134      | rs372290750 | 33/D/PD                   | US                           |
| ARID1B | c.4234T>G | p.Ser1412Ala | het | Coffin-Siris syndrome 1<br>(135900, AD)          | 0.00012       | rs145516400 | 8,831/T/B                 | LB                           |
| KCNQ3  | c.2146G>C | p.Asp716His  | het | Seizures, benign<br>neonatal, 2 (121201, AD)     | 0.000055      | rs149324120 | 16,04/T/B                 | LB                           |

Zig: homozygosity/heterozygosity; het: heterozygote; Inh: inheritance; Pat: paternal; Mat: maternal; CADD (Phred-SCALED CADD score, indicating level of deleteriousness); SIFT (D - Damaging; T - Tolerated); PP2: Polyphen2 (D - Probably damaging; P - Possibly damaging; B - Benign); LB: Likely Benign; US: Uncertain Significance

1. Pathologies previously associated with mutations in these genes. In brackets MIM number of the associated disease and its inheritance (according to OMIM). (\*) Filtered variant in gnomAD

2. According with the ACMG/AMP 2015 guideline.

**Note:** none of these changes was found in ClinVar.

**Supplementary Table 3.** Variants of Unknown significance identified in Patient 3.

| Gene            | cDNA      | Protein     | Zig | Disease <sup>1</sup> (MIM; Inh)                                                                        | Origin  | gnomAD<br>MAF | db SNP       | Effect<br>(CADD/SIFT/PP2) |
|-----------------|-----------|-------------|-----|--------------------------------------------------------------------------------------------------------|---------|---------------|--------------|---------------------------|
| <i>TMPO</i>     | c.610G>T  | p.Gly204Cys | het | -                                                                                                      | De novo | -             | -            | 21.4/D/D                  |
| <i>APOBEC3F</i> | c.340A>C  | p.Thr114Pro | het | -                                                                                                      | De novo | 0.000164      | rs753023597  | 20.8/D/D                  |
| <i>PTPN22</i>   | c.2198C>A | p.Thr733Lys | het | Susceptibility to diabetes type 1<br>(222100; AR) & Susceptibility to<br>rheumatoid arthritis (180300) | Pat     | -             | -            | 25.4/D/D                  |
|                 | c.1366C>G | p.Gln456Glu | het |                                                                                                        | Mat     | 0.001773      | rs72650672   | 21.1/D/D                  |
| <i>ERO1LB</i>   | c.278A>G  | p.Lys93Arg  | het | none                                                                                                   | Mat     | 0.001224 (1)  | rs147983087  | < 20/T/B                  |
|                 | c.189A>C  | p.Lys63Asn  | het |                                                                                                        | Pat     | 0.002091 (4)  | rs35648587   | < 20/D/D                  |
| <i>SYCP2L</i>   | c.177T>A  | p.Asn59Lys  | het | none                                                                                                   | Pat     | 0.000004      | rs1052522642 | 23.0/D/P                  |
|                 | c.212A>C  | p.Asn71Thr  | het |                                                                                                        | Pat     | 0.000004      | rs780214095  | < 20/T/P                  |
|                 | c.1100T>C | p.Ile367Thr | het |                                                                                                        | Mat     | 0.002272 (1)  | rs148762988  | 23.2/D/D                  |

Zig: homozygosity/heterozygosity; het: heterozygote; Inh: inheritance; Pat: paternal; Mat: maternal; CADD (Phred-SCALED CADD score, indicating level of deleteriousness); SIFT (D - Damaging; T - Tolerated); PP2: Polyphen2 (D - Probably damaging; P - Possibly damaging; B - Benign).

1. Pathologies previously associated with mutations in these genes. In brackets MIM number of the associated disease and its inheritance (according to OMIM).

**Note:** none of these changes was found in ClinVar.

**Supplementary Table 4.** Variants of Unknown significance identified in Patient 4.

| Gene          | cDNA                   | Protein          | Zig | Disease <sup>1</sup> (MIM; Inh)            | Origin  | gnomAD<br>MAF    | dbSNP      | Effect<br>(CADD/SIFT/<br>PP2) | ClinVar<br>classification          |
|---------------|------------------------|------------------|-----|--------------------------------------------|---------|------------------|------------|-------------------------------|------------------------------------|
| <b>LRRC8D</b> | c.1902G>A              | p.Met634Ile      | het | -                                          | De novo | -                | -          | 23.5/D/P                      | -                                  |
| <b>SLC4A8</b> | c.1499C>G <sup>7</sup> | p.Ala500Gly      | het | -                                          | De novo | -                | -          | < 20/T/B                      | -                                  |
| <b>LTBP3</b>  | c.2856_2857<br>delCC   | p.Asp952Glufs*41 | het | Geleophysic<br>dysplasia 3 (617809;<br>AD) | De novo | -                | -          | .                             | -                                  |
| <b>SCFD2</b>  | c.848G>T               | p.Gly283Val      | hom | -                                          | Pat/Mat | 0.007204<br>(13) | rs79025139 | 28.7/D/D                      | -                                  |
| <b>GPR98</b>  | c.746G>A               | p.Arg249Lys      | het | Usher syndrome,<br>type 2C (605472; AR)    | Mat     | 0.006381<br>(15) | rs41303344 | < 20/T/B                      | Conflicting: B(3);LB<br>(2);LP (1) |
|               | c.5830G>A              | p.Asp1944Asn     | het |                                            | Pat     | 0.004284<br>(6)  | rs41302834 | 25.0/D/D                      | Benign/Likely<br>benign            |

Zig: homozygosity/heterozygosity; het: heterozygote; hom: homozygote; Inh: inheritance; Pat: paternal; Mat: maternal; CADD (Phred-SCALED CADD score, indicating level of deleteriousness); SIFT (D - Damaging; T - Tolerated); PP2: Polyphen2 (D - Probably damaging; P - Possibly damaging; B - Benign).

1. Pathologies previously associated with mutations in these genes. In brackets MIM number of the associated disease and its inheritance (according to OMIM).

**Supplementary Table 5.** Variants of Unknown significance identified in Patient 5.

| Gene          | cDNA          | Protein        | Zig | Disease <sup>1</sup> (MIM; Inh)                            | Origin | gnomAD<br>MAF | db SNP      | Effect (CADD) |
|---------------|---------------|----------------|-----|------------------------------------------------------------|--------|---------------|-------------|---------------|
| <i>PC</i>     | c.2491G>A     | p.Val831Met    | het | Pyruvate carboxylase deficiency; (608786; AR)              | NA     | 0.0000039     | rs762323318 | 25.9          |
| <i>ATP1A2</i> | c.1285G>A     | p.Ala429Thr    | het | Alternating hemiplegia of childhood; (104290; AD)          | NA     | 0.00004 (5)   | rs77608625  | 26.7          |
| <i>RENBP</i>  | c.1091A>C     | p.Glu364Ala    | het | -                                                          | NA     | 0.000006      | -           | 26.8          |
| <i>PMPCA</i>  | c.1263+84delG | intron variant | het | Spinocerebellar ataxia, autosomal recessive 2 (213200; AR) | NA     | 0.000004      | rs773313604 | <20           |

Zig: homozygosity/heterozygosity; het: heterozygote; Inh: inheritance; CADD (Phred-SCALED CADD score, indicating level of deleteriousness). NA: Not Analyzed.

1. Pathologies previously associated with mutations in these genes. In brackets MIM number of the associated disease and its inheritance (according to OMIM)

**Note:** none of these changes was found in ClinVar.
